# Supplementary material
Source: publisher figshare collection journal article supplement (https://gsapubs.figshare.com/ndownloader/files/22747376)

**DATA REPOSITORY: Berger and Spotila, in rev., “Denudation and Deformation of a Glaciated Orogenic Wedge: The St. Elias Orogen, Alaska”**

**APPENDIX DR-1: Thermochronologic methods**

Low-temperature thermochronometry was used to constrain the exhumation pattern across the St. Elias orogen. New (U-Th)/He ages of apatite (AHe) were obtained from bedrock samples collected by helicopter along the east-west ELA front along the windward flank of the orogen. Samples used consisted mainly of sedimentary (arkose, graywacke) and metamorphic (gneiss) lithologies. New ages were combined with previous AHe ages from Spotila et al. (2004) and Berger et al (in press). (U-Th)/He is based on the radiogenic production and thermally-controlled diffusion of  $^4\text{He}$  within host minerals. Apparent AHe cooling ages typically correspond to closure temperatures of  $\sim 70^\circ\text{C}$ , but closure temperature is cooling-rate and grain-size dependent (Wolf et al., 1996; Farley, 2000; Ehlers and Farley, 2003).

AHe ages were measured at Virginia Tech on 1-25 grain,  $\sim 0.01$ - $0.03$  mg aliquots (Table DR-1). Apatite grains dated were  $\geq 70 \mu\text{m}$  in diameter and were screened for microinclusions and other crystal defects at 100x magnification. Although the highest quality apatite grains available were used, apatite yields from some samples were poor, forcing the use of lower-quality grains. To counter the potential effect of U- and Th-bearing microinclusions (i.e. zircon and monazite (House et al., 1997)), fluid inclusions, or parent nuclide zonation on measured ages (Fitzgerald et al., 2006), we analyzed multiple ( $\sim 5$ ) replicates per sample (a total of 97 analyses for 19 samples). This enabled evaluation of sample reproducibility and identification of anomalously old outliers that

likely have  $^4\text{He}$  contamination. Samples were outgassed in Pt tubes in a resistance furnace at 940 °C for 20 minutes (followed by a 20-minute reextraction test) and analyzed for  $^4\text{He}$  by isotope dilution utilizing a  $^3\text{He}$  spike and quadrupole mass spectrometry. Blank levels for  $^4\text{He}$  detection using current procedures at Virginia Tech are  $\sim 0.2$  femtomoles. Radiogenic parent isotopes ( $^{238}\text{U}$ ,  $^{235}\text{U}$ , and  $^{232}\text{Th}$ ) were measured at Yale University and Caltech using isotope dilution ( $^{235}\text{U}$  and  $^{230}\text{Th}$  spike) and ICP mass spectrometry. Although  $^4\text{He}$  is also produced by  $^{147}\text{Sm}$  decay, it was not routinely measured because it should produce  $<1\%$  of radiogenic  $^4\text{He}$  in typical apatite and should only be a factor in AHe ages when U concentrations are  $<5$  ppm (which applies to none of our samples; Table DR1) (Farley and Stockli, 2002; Reiners and Nicolescu, in press).

Routine  $1\sigma$  uncertainties due to instrument precision are  $\pm 1\text{-}2\%$  for U and Th content,  $\pm 2\text{-}3\%$  for He content, and  $\pm 4\text{-}5\%$  for alpha ejection correction factor based on grain dimension and shape. Cumulative analytical uncertainty is thus approximately  $\pm 10\%$  ( $2\sigma$ ). Age accuracy was cross-checked by measurements of known standards, such as Durango fluorapatite ( $30.9 \pm 1.53$  Ma ( $1\sigma$ ;  $n=40$ )), with a known age of 31.4 Ma (McDowell et al., 2005)). These measurements on Durango show that reproducibility on some natural samples is comparable to that expected from analytical errors.

Uncertainties for samples are reported as the observed standard deviation from the mean of individual age determinations (Table DR-1). The average AHe reproducibility on well-reproduced average ages is  $\sim 11\%$  ( $1\sigma$ ; 16 samples, 74 age determinations), which is worse than that obtained from Durango apatite. Some samples with very young average AHe ages reproduced well, such as 05STP2 ( $0.44$  Ma  $\pm 6.9\%$   $1\sigma$ ,  $n=5$ ) and 05STP4 ( $0.74$  Ma  $\pm 9.7\%$   $1\sigma$ ,  $n=6$ ). Other samples reproduced more poorly. The 11%

average reproducibility excludes three samples (05STP11, 06STP1, 06STP71) that reproduced poorly ( $1\sigma > 20\%$ ). Two of these samples are from thin Cenozoic stratigraphy on the eastern end of the orogen and may be only partially reset (see below). The 11% average reproducibility also ignores ten individual age determinations that were considered outliers and culled prior to calculation of average age, because they were significantly older than concordant replicates and were likely contaminated by excess  $^4\text{He}$  due to inclusions (Table DR-1).

The pattern of new ages measured here are consistent with previous AHe dating in the orogen (Spotila et al., 2004; Berger et al., in rev.) (Fig. 1). One sample dated here was also dated previously by Spotila et al. (2004), but with a discrepant result. Sample 02CH28 was reported as average AHe of 4.8 Ma by Spotila et al. (2004), but was redated here as 0.73 Ma (Table DR-1). One of four new age determinations was anomalously old (Table DR-1), suggesting this sample is prone to  $^4\text{He}$  contamination by micro-inclusions. Although there is no independent indication that the earlier analyses were inaccurate due to poor apatite quality, we choose to use the younger age population (i.e. the new data) for our interpretations here (Fig. 1).

AHe ages constrain the pattern of low-temperature cooling throughout most of the orogen (Fig. 1). However, many of the samples that reproduced poorly are from the eastern part of the orogen, near the bend in the plate boundary at the Fairweather fault and the Seward and Hubbard outlet glaciers. One sample from near the Hubbard glacier is very young (06STP4, 0.56 Ma), but other samples from this region do not yield reproducible ages. This may be because these Cenozoic sedimentary samples were not buried deeply enough to be completely reset. The stratigraphic cover of the Yakutat

terrane is thinner on the east than on the west, and if these sample were exhumed from very shallow depths, some detrital grains may retain pre-depositional  $^4\text{He}$ . As a result, two of the resulting average ages (06STP71 and 06STP3) were not used for the contours on Fig. 1 and were excluded from the regression plot in Fig. 2b.

For the purposes of this study, we primarily focus on differences in apparent cooling ages, rather than estimates of exhumation rate. Assuming geothermal and topographic conditions are more or less uniform across the orogen, the 50-fold difference in cooling ages across the orogen should represent major differences in exhumation rate. However, it is still useful to consider what exhumation rates these young AHe ages may correspond to. Given the rapid cooling, a closure temperature approach is a suitable approximation for estimating exhumation rate. Closure temperatures for these rapidly-cooled samples should vary from  $\sim 70\text{-}90^\circ\text{C}$ , based on sample grain sizes and standard apatite diffusion parameters (Farley, 2000). Based on regional estimates of geothermal gradient in the absence of rapid denudation of  $25^\circ\text{C/km}$  (Magoon, 1986; Johnsson et al., 1992; Johnsson and Howell, 1996), this range in closure temperature should correspond to closure depths of 2.8-3.6 km. However, it is likely that heat is advected due to rapid exhumation, such that the geothermal gradient is steeper. Using the 1-dimensional, steady-state thermokinematic solution to the crust's thermal profile from Reiners and Brandon (2006), the geothermal gradient could be elevated to  $\sim 46^\circ\text{C/km}$  if denudation rates are as high as 5 mm/yr, assuming reasonable boundary conditions for the orogenic wedge (layer thickness ( $L$ ) of 10 km (the maximum stratigraphic thickness above subducting Eocene oceanic crust of the accreting Yakutat terrane (Plafker et al., 1994)), and thermal parameters from Reiners and Brandon (2006) of thermal diffusivity  $\kappa = 27.4$

km<sup>2</sup>/Ma, surface temperature  $T_s = 0$  °C, basal temperature  $T_L = 250$  °C (for regional geothermal gradient of 25 °C/km), and internal heat production  $H_T = 4.5$  °C/Ma). This approach assumes that fluid convection does not influence isotherm depth. Using this elevated geothermal gradient, AHe closure depths for the area of rapid cooling are 1.5-2 km, such that AHe contours of 0.5, 0.75, and 1.0 Ma on Fig. 1 correspond to maximum time-averaged exhumation rates of 4.0, 2.7, and 2.0 mm/yr. This elevated geothermal gradient was also used for the exhumation rates in Fig. 3.

Such rapid rates of exhumation are consistent with a poorly-defined age-elevation gradient from a near-vertical sample transect from just west of the Bering glacier. Three samples from Khitrov ridge define a very rough age-elevation gradient of 0.144 Ma/km (6.9 mm/yr) between 0.44 and 0.53 Ma (Fig. DR-1). The zero-age intercept of this gradient occurs at 2.5 km below sea level, which given the ~0.5 km mean elevation of the area corresponds to ~3.0 km below the surface. The rate of exhumation required to bring the bottom sample to the surface from this depth is 6.8 mm/yr, such that the gradient and the intercept are mutually consistent. Using a closure temperature for these samples of ~88 °C, calculated iteratively based on grain size, diffusion characteristics (Farley, 2000), and the resulting cooling rate, the inferred geothermal gradient is 29 °C/km. This implies even faster exhumation than estimated using the 1-dimensional model and 46 °C/km geothermal gradient. Age-elevation gradients can be affected by variations in isotherm shape associated with topography. Calculations by Mancktelow and Grasemann (1997) for a case of similar relief (1.5 km), topographic wavelength (~5 km), geothermal gradient (~35° C/km), closure temperature (100 °C), and exhumation rate (5 mm/yr), suggest that the age-elevation gradient could overestimate the exhumation rate by ~20%.

116 Given that the age-elevation gradient is poorly defined and likely overestimates  
117 exhumation rate, we use the result from the 1-dimensional model for our interpretations.  
118 However, this relief transect at least corroborates that exhumation rates in the area are  
119 very rapid.

120 Other effects of sample elevation and topography are not likely to alter the first  
121 order patterns of exhumation we infer for this area. Samples were generally collected  
122 from ridge tops of comparable relief (~1-2 km) by helicopter. This should help minimize  
123 the effect of variable isotherm shape and deviations between local sample elevation and  
124 mean topography on inferred exhumation rates. In addition, given the typical 10-km-  
125 wavelength relief of ~1-2 km for most of the area (higher-relief parts of the orogen have  
126 not been sampled; Fig. 1), the maximum difference in closure depths between locations  
127 should be less than a factor of two, which cannot account for the ~50-fold difference in  
128 ages from north to south or the ~5-fold difference within the rapidly-cooled windward  
129 flank. Based on this, we interpret the pattern of AHe ages to reflect spatial variations in  
130 exhumation rate.

131

## 132 **APPENDIX DR-2: Glaciological parameters and precipitation data**

133 The source areas for the major southward-flowing glaciers in the St. Elias orogen  
134 were defined based on ice distributions on 1:250,000 USGS topographic maps (Fig. DR-  
135 2). Divides were drawn based on the principle that ice flows down ice gradient, such that  
136 ice divides are the highest point on a continuous ice sheet that flows into multiple glacier  
137 systems. The glacier drainage areas upstream of equilibrium line altitudes (ELA) were  
138 calculated graphically and are listed in Table DR-2. These drainage areas include

hillslopes above the glaciers and are thus larger than the surface area of ice above ELA, but are obviously only a subset of the total drainage basin of each glacier (i.e. extended to the glacier termini). Given that the maps used were in some cases decades old, and the fact that glaciers have receded in much of this region over the past century (Porter, 1989), the ice distributions and ELA shown should be considered approximate 20<sup>th</sup> century conditions.

Modern glacier ELAs were determined for large and small windward-flowing glaciers on the basis of topographic contours of the glacier surfaces from 1:250,000 scale USGS maps. ELAs for the glaciers shown in Figs. 1 and DR-2 are listed in Table DR-2. This method is based on defining the boundary between accumulation and ablation areas on the glacier, where accumulating regions have concave contours and ablation areas have convex contours in the direction of glacier flow (Meierding, 1982; Mayo, 1986; Benn and Lehmkuhl, 2000). This technique is simple and can be performed using only topographic maps over a wide area, but provides only an approximation of true ELA. It is less accurate than other approaches, such as using field or airphoto observations of snowcover during the melt season, smaller glaciers, or other meteorological data. The accumulation area ratio (AAR) technique could not be used, given that many glaciers flow directly into the ocean and experience ice removal by calving. However, the results obtained are consistent with regional syntheses of modern ELA (Péwé, 1975; Mayo, 1986).

More precise determination of modern ELAs would not enhance the comparison to AHe ages, given that uncertainties in paleo-ELAs are much larger (see below) and because ELAs should fluctuate significantly even at decadal timescales. Glaciers exhibit

a prolonged response, called physical memory, to cyclic variations in precipitation in the absence of climate change (e.g. Pacific Decadal Oscillation), such that ELAs may routinely shift horizontally by up to several kilometers (Roe and O’Neal, in prep.). More recent airphotos and satellite imagery would also be affected by the rapid glacial retreat that has occurred in Alaska over the past few decades, and may thus not represent typical interglacial conditions. The use of coarse topographic maps ignore these short term fluctuations and may thus better approximate mean 20<sup>th</sup> century conditions. Nonetheless, uncertainties in the horizontal position of modern ELA are assumed to be at least  $\pm 2$  km.

Uncertainties in the position of paleo-ELA during glacial maxima periods outweigh errors in the position of modern ELA. Paleo-ELA is not well constrained along the windward flank of the orogen, given post-glacial-maximum erosion and deposition on the continental margin. We assumed ELA was  $\sim 300$  m lower along the coast during glacial maxima, based on regional estimates (Péwé, 1975). ELAs during glacial maxima are not well constrained, however, and may have fluctuated throughout the Quaternary (e.g. the Illinoan glacial maximum ELA was lower than the last glacial maximum ELA; Péwé, 1975). This assumption of paleo-ELA provides a weak lower bound of what we define as the “ELA front”, or the zone lying between modern and glacial-maxima ELA on the windward flank of the orogen. Based on errors in the elevation of paleo-ELA of at least  $\pm 100$  m and because of the gentle slope of the coastal plain, we assign  $\pm 5$  km horizontal uncertainty to the lower bound of the ELA front.

We compare these glaciological parameters to bedrock cooling and exhumation in several ways. The comparison between AHe age distribution and the position of the ELA front (Figs. 1, 2) should test how time-averaged, long-term denudation is associated with

the zone of theoretically-greatest ice flux and erosion on individual glaciers (Andrews, 1972; Hallet, 1979; Anderson et al., 2006). This comparison is only approximate, however, given that the position of ELAs during glacial maxima are poorly constrained and that mean ELA may fluctuate due to changes in climate or topography over shorter ( $10^5$  yr) timescales than the AHe cooling ages ( $10^6$  yr). The comparison of long-term exhumation rates with variations in ice flux along strike is more poorly constrained (Fig. 3). Modern glacier drainage areas at ELA should only approximate relative differences in modern ice discharge between glaciers, given that precipitation varies across the area by up to a factor of two (Fig. DR-2) and due to other complicating variables which are not considered (e.g. aspect, albedo, etc.). Modern glacier drainage areas should be an even poorer representation of mean Quaternary ice discharge, given that precipitation patterns and glacier drainage divides could have varied between glacial cycles. Better constraints on the position of ELA during glacial maxima or climate-glacier flow models that predict the distribution of glaciers throughout the Quaternary would improve this comparison. Given the likelihood that outlet glaciers have been fixed during at least the last few glacial cycles by Waxell-St. Elias ridge (see below), however, it is likely that the heterogeneity in modern drainage areas at least approximates how ice discharge has varied throughout multiple glacial intervals.

Existing precipitation data for the St. Elias orogen are sparse. Estimated isohyets of mean annual precipitation based on a regional climate summary of existing precipitation data and patterns of snow lines throughout the state of Alaska are shown in Fig. DR-2 (Péwé, 1975). These isohyets have poor resolution and likely miss major spatial variations in precipitation associated with local topography. A second estimate of

mean annual precipitation is from the Spatial Climate Analysis Center (2002) (Fig. DR-2). This uses the statistical method *PRISM* (Parameter-elevation Regression on Independent Slopes Model), which combines historical point data for annual precipitation (from 1961-1990) with 2-km-resolution topography from a digital elevation model to estimate the effects of terrain on climate in mountainous regions (Daly et al., 1994). Although the PRISM precipitation data are based on similarly limited observations as Péwé (1975), we consider it more accurate because it accounts for the local effects of orography. The variation in precipitation for both sources are shown along the north-south transect (AA') in Fig. 2. Neither appears to correlate with the location of the youngest AHe ages. However, the poor constraints on precipitation in this area severely limits this comparison with AHe age distribution.

### **APPENDIX DR-3: Waxell-St. Elias Ridge**

The zone of rapid denudation and the ELA front both occur south of a prominent east-west ridge, which forms an impressive barrier to ice flow in the St. Elias orogen. The Waxell-St. Elias ridge runs east-west, parallel to the coast, and consists of several discrete, elliptical segments that span a total of >300 km (Fig. 1, DR-3). Glaciers currently flow north to south through this barrier at only five locations, where major outlet glaciers with massive ice discharge occur (e.g. Bering and Malaspina glaciers; Figs. 1, DR-2, DR-3). During glacial maxima periods, it is likely that ice flow over this ridge occurred at only several other points, given its height relative to the probable elevation of the Bagley ice field behind it (Fig. DR-3). This means that most of the ELA

front would have been isolated from direct north to south ice flow across this barrier, thereby keeping ice discharge heterogenous along the range front during glacial maxima.

The prominent Waxell-St. Elias ridge may have also had an important influence on the pattern of glaciation and denudation in the orogen. The ridge exists partly due to motion of a backthrust under the Bagley ice field (Berger et al., in press), but is also due to the presence of very resistant bedrock (greenschist-amphibolite grade metasediment and metavolcanics; Plafker et al., 1994). As a result of this ridge, glaciers are unable to flow directly south across the orogen, resulting in just a few local outlet glaciers and considerable east-west ice flow north of the ridge (Fig. 1, DR-2). The zone of rapid denudation occurs just south of this ridge, within easily-eroded Cenozoic stratigraphy of the deforming Yakutat terrane. In contrast, the accumulation area of southward flowing outlet glaciers is floored by more resistant bedrock of the Prince William and Chugach terranes (Plafker et al., 1994). This may help facilitate denudation at the ELA front, by resisting erosion in the north, trapping ice in the Bagley ice field, forcing ice flow through narrow outlets, and perhaps even by focusing orographic precipitation and ice-avalanching on the ELA front to the south. Without the Waxell-St. Elias ridge, the glacio-erosional evolution of the orogen may have been different, thus implying that physiogeologic setting has been an important part of this orogen's history.

## REFERENCES

Benn, D.I., and Lehmkuhl, F., 2000, Mass balance and equilibrium line altitudes of glaciers in high-mountain environments, *Quat. Int.*, 65/66, 15-29.

- 252 Berger, A.L., Spotila, J.A., Chapman, J., Pavlis, T., and Enkelmann, E., in review,  
253 Architecture, kinematics, and exhumation, across the central St. Elias Orogen; A  
254 thermochronologic approach, *Earth. and Planet. Sci. Lett.*
- 255 Daly, C., Neilson, R.P., and Phillips, D.L., 1994, A statistical-topographic model for  
256 mapping climatological precipitation over mountainous terrain, *Journal of Applied*  
257 *Meteorology*, 33, 140-158.
- 258 Ehlers, T., and Farley, K., 2003, Apatite (U-Th)/He thermochronometry: methods and  
259 applications to problems in tectonics and surface processes, *Earth and Planetary*  
260 *Science Letters*, 206, 1-14.
- 261 Farley, K.A., 2000, Helium diffusion from apatite: General behavior as illustrated by  
262 Durango fluorapatite: *Journal of Geophysical Research*, 105, 2903–2914.
- 263 Farley, K.A., and Stockli, D.F., 2002, (U-Th)/He dating of phosphates: apatite, monazite,  
264 and xenotime, in *Phosphates: Geochemical, Geobiological, and Materials Importance*,  
265 *Rev. Mineral. Geochem.*, vol. 48, 559-577.
- 266 Fitzgerald, P.G., Baldwin, S.L., Webb, L.E., and O’Sullivan, P.B., 2006, Interpretation of  
267 (U-Th)/He single grain ages from slowly cooled crustal terranes: A case study from the  
268 Transantarctic Mountains of southern Victoria Land: *Chemical Geology*, 225, 91-120.
- 269 House, M.A., Wernicke, B.P., Farley, K.A., and Dumitru, T.A., 1997, Cenozoic thermal  
270 evolution of the central Sierra Nevada from (U-Th)/He thermochronometry: *Earth*  
271 *Planet. Sci. Lett.*, 151, 167-179.
- 272 Mancktelow, N.S., and Grasemann, B., 1997, Time-dependent effects of heat advection  
273 and topography on cooling histories during erosion, *Tectonophysics*, 270, 167-195.

- 274 Mayo, L.R., 1986, Annual runoff rate from glaciers in Alaska: A model using the altitude  
275 of glacier mass balance equilibrium, in D.L. Kane (ed.), Cold Regions Hydrology  
276 Symposium, Amer. Water Res. Assoc., Bethesda, Maryland, 509-517.
- 277 McDowell, F.W., McIntosh, W.C., and Farley, K.A., 2005, A precise  $^{40}\text{Ar}/^{39}\text{Ar}$  reference  
278 age for the Durango apatite (U-Th)/He and fission-track dating standard: Chemical  
279 Geology, 214, 249-263.
- 280 Meierding, T.C., 1982, Late Pleistocene glacial equilibrium-line altitudes in the Colorado  
281 front range: A comparison of methods, Quat. Res., 18, 289-310.
- 282 Meigs, A., and Sauber, J., 2000, Southern Alaska as an example of the long-term  
283 consequences of mountain building under the influence of glaciers, Quat. Sci. Reviews,  
284 19, 1543-1562.
- 285 Péwé, T.L., 1975, Quaternary geology of Alaska, U.S. Geol. Surv. Professional Paper,  
286 835, 139 p.
- 287 Porter, S.C., 1989, Late Holocene fluctuations of the fjord glacier system in Icy Bay  
288 Alaska, Arctic and Alpine Research, 21, 364-379.
- 289 Reiners, P.W., and Brandon, M.T., 2006, Using thermochronology to understand  
290 orogenic erosion, Ann. Rev. Earth and Planet. Sci., 34, 419-466.
- 291 Reiners, P.W., and Nicolescu, S., in press, Measurement of parent nuclides for (U-Th)/He  
292 chronometry by solution sector ICP-MS, Geochim. Cosmochim. Acta.
- 293 Roe, G. and O'Neal, M.A., in prep., The response of glaciers to intrinsic climate  
294 variability: observations and models of late Holocene variations in the Pacific  
295 Northwest, J. Glaciology.

296 Spatial Climate Analysis Center, 2002, PRISM 1961-1990 Mean Annual Precipitation:  
 297 Alaska, Oregon Climate Service, Oregon State University, via The Climate Source,  
 298 [http://www.cimatesouce.com/ak/fact\\_sheets/akppt\\_xl.jpg](http://www.cimatesouce.com/ak/fact_sheets/akppt_xl.jpg).

299 Spotila, J.A., Buscher, J., Meigs, A., and Reiners, P., 2004, Long-term glacial erosion of  
 300 active mountain belts: Example of the Chugach-St. Elias Range, Alaska, *Geology*, 32,  
 301 501-504.

302 Wolf, R.A., Farley, K.A., and Silver, L.T., 1996, Helium diffusion and low-temperature  
 303 thermochronometry of apatite, *Geochim. Cosmochim. Acta*, 60, 4231-4240.

304

### 305 **FIGURE CAPTIONS**

306 Figure DR-1: Vertical AHe transect at Khitrov ridge, just west of the Bering glacier. The  
 307 samples represented are (from highest to lowest) 05STP3, 05STP1, and 05STP2 (Fig.  
 308 1). Individual age determinations are shown as triangles, whereas the average age for  
 309 each sample is shown as a large circle. Error bars for the average ages are given for the  
 310 standard deviation of individual analyses ( $1\sigma$ ). The regression is based on the three  
 311 average ages, rather than on all individual age determinations, with age as the  
 312 dependent variable. Regression equation shown at bottom right.

313 Figure DR-2: Glacier drainage basins of the St. Elias orogen, overlain on shaded relief  
 314 map from USGS 60-m DEMs. Glacier basins were mapped using 1:250,000 scale  
 315 topographic maps, based on the elevation of the glacier surface and direction of the ice-  
 316 surface gradient (*cf.* Mayo, 1986). Only glaciers that drain southwards or eastwards are  
 317 shown; smaller glaciers on the leeward flank of the range are not plotted. ELAs of each  
 318 glacier are shown as the bright blue lines and were determined based on the boundary

between concave (above ELA) and convex (below ELA) ice contours (*cf.* Péwé, 1975).

The names, drainage areas, and ELAs of each numbered glacier are listed in Table DR-

2. Two sets of isohyets of mean annual precipitation (cm/yr) are shown. Those in black

are from the regional climate summary of Péwé (1975). Those in blue are from PRISM

model of recent precipitation data (Spatial Climate Analysis Center, 2002). Line AA'

indicates profile used to construct Fig. 2.

Figure DR-3: West to east profile of Waxell-St. Elias ridge (BB', Fig. 1). Maximum

elevation along the circuitous ridge line is from 1:250,000 scale maps. The ridge is

comprised of four elliptical sections (dashed lines) separated by outlet glaciers. Height

of the modern surface of the Bagley ice field to the north is shown as heavier dashed

line. Ice currently cuts through the ridge at only five locations (denoted by stars), and

may have flowed over the ridge during glacial maxima at three additional spots

(denoted by circles).

**Table DR-1:** AHe data.

| Sample           | Elev. (m) | Latitude | Longitude  | Lithology    | # Grains | Mass (mg) | Ft    | U ppm | Th ppm | MWAR  | He pmol | Age (Ma)    | Avg. (Ma)        | % SD   |
|------------------|-----------|----------|------------|--------------|----------|-----------|-------|-------|--------|-------|---------|-------------|------------------|--------|
| <b>05STP1-1</b>  | 946       | 60.4208° | -143.5028° | arkose       | 7        | 0.0311    | 0.796 | 23.5  | 36.9   | 63.0  | 0.0019  | <b>0.45</b> | <b>0.53±0.07</b> | ±14.2% |
| -2               |           |          |            | (Kulthieth)  | 8        | 0.0526    | 0.820 | 25.3  | 26.4   | 77.8  | 0.0048  | <b>0.67</b> |                  |        |
| -3               |           |          |            |              | 8        | 0.0323    | 0.767 | 22.6  | 31.3   | 61.1  | 0.0021  | <b>0.55</b> |                  |        |
| -4               |           |          |            |              | 8        | 0.0603    | 0.826 | 24.1  | 7.85   | 81.8  | 0.0036  | <b>0.54</b> |                  |        |
| -5               |           |          |            |              | 4        | 0.0419    | 0.838 | 6.28  | 6.82   | 82.4  | 0.0007  | <b>0.50</b> |                  |        |
| -6               |           |          |            |              | 4        | 0.0320    | 0.837 | 15.4  | 31.0   | 85.6  | 0.0014  | <b>0.45</b> |                  |        |
| <b>05STP2-1</b>  | 620       | 60.3931° | -143.5422° | arkose       | 16       | 0.0377    | 0.743 | 25.0  | 36.6   | 51.9  | 0.0019  | <b>0.39</b> | <b>0.44±0.03</b> | ±6.9%  |
| -2               |           |          |            | (Kulthieth)  | 15       | 0.0342    | 0.736 | 41.1  | 42.3   | 50.6  | 0.0029  | <b>0.43</b> |                  |        |
| -3               |           |          |            |              | 16       | 0.0455    | 0.759 | 37.6  | 60.0   | 55.3  | 0.0043  | <b>0.46</b> |                  |        |
| -4               |           |          |            |              | 11       | 0.0403    | 0.771 | 34.6  | 21.1   | 61.7  | 0.0030  | <b>0.47</b> |                  |        |
| -5               |           |          |            |              | 13       | 0.0487    | 0.777 | 33.5  | 23.9   | 60.6  | 0.0036  | <b>0.47</b> |                  |        |
| <b>05STP3-1</b>  | 1252      | 60.4332° | -143.5044° | arkose       | 14       | 0.0446    | 0.755 | 29.0  | 29.8   | 54.5  | 0.00041 | <b>0.64</b> | <b>0.53±0.10</b> | ±19.6% |
| -2               |           |          |            | (Kulthieth)  | 7        | 0.0569    | 0.823 | 37.1  | 29.1   | 84.9  | 0.0070  | <b>0.65</b> |                  |        |
| -3               |           |          |            |              | 12       | 0.0458    | 0.866 | 17.7  | 17.7   | 59.2  | 0.0018  | <b>0.39</b> |                  |        |
| -4               |           |          |            |              | 9        | 0.0435    | 0.798 | 39.5  | 46.2   | 71.0  | 0.0040  | <b>0.44</b> |                  |        |
| -6               |           |          |            |              | 3        | 0.0211    | 0.836 | 15.2  | 22.4   | 79.2  | 0.0010  | <b>0.55</b> |                  |        |
| <b>05STP4-1</b>  | 394       | 60.3896° | -143.6997° | arkose       | 6        | 0.0411    | 0.830 | 10.1  | 16.2   | 74.4  | 0.0021  | <b>0.86</b> | <b>0.74±0.07</b> | ±9.7%  |
| -2               |           |          |            | (Kulthieth)  | 6        | 0.0341    | 0.803 | 22.5  | 30.4   | 65.8  | 0.0031  | <b>0.73</b> |                  |        |
| -3               |           |          |            |              | 5        | 0.0416    | 0.819 | 58.2  | 64.4   | 76.0  | 0.0093  | <b>0.72</b> |                  |        |
| -4               |           |          |            |              | 5        | 0.0391    | 0.825 | 28.5  | 25.9   | 74.2  | 0.0046  | <b>0.78</b> |                  |        |
| -5               |           |          |            |              | 6        | 0.0556    | 0.837 | 11.6  | 15.1   | 82.3  | 0.0023  | <b>0.62</b> |                  |        |
| -6               |           |          |            |              | 6        | 0.0559    | 0.827 | 46.1  | 38.1   | 77.4  | 0.0100  | <b>0.75</b> |                  |        |
| <b>05STP7-1</b>  | 1140      | 60.8838° | -143.7637° | gneiss       | 6        | 0.0380    | 0.810 | 95.2  | 2.3    | 72.7  | 0.3984  | <b>25.9</b> | <b>25.1±0.87</b> | ±3.5%  |
| -2               |           |          |            | (Chugach)    | 4        | 0.0270    | 0.832 | 100.5 | 0.6    | 78.1  | 0.2982  | <b>25.3</b> |                  |        |
| -3               |           |          |            |              | 5        | 0.0201    | 0.777 | 109.3 | 0.6    | 57.9  | 0.2269  | <b>25.4</b> |                  |        |
| -4               |           |          |            |              | 10       | 0.0142    | 0.728 | 75.3  | 1.0    | 42.2  | 0.0962  | <b>23.6</b> |                  |        |
| <b>05STP11-1</b> | 1448      | 60.5428° | -143.4165° | sandstone    | 5        | 0.0157    | 0.765 | 36.0  | 28.6   | 56.0  | 0.0463  | <b>17.3</b> | <b>1.78±0.83</b> | ±46.7% |
| -2               |           |          |            | (Orca Group) | 13       | 0.0146    | 0.678 | 61.0  | 36.0   | 38.0  | 0.0103  | <b>2.86</b> |                  |        |
| -3               |           |          |            |              | 15       | 0.0164    | 0.675 | 43.8  | 36.2   | 39.9  | 0.0050  | <b>1.64</b> |                  |        |
| -4               |           |          |            |              | 15       | 0.0164    | 0.658 | 22.6  | 26.2   | 40.8  | 0.0014  | <b>0.84</b> |                  |        |
| <b>05STP15-1</b> | 488       | 60.2306° | -143.9758° | sandstone    | 15       | 0.0278    | 0.715 | 23.6  | 26.6   | 46.7  | 0.0055  | <b>1.76</b> | <b>1.80±0.11</b> | ±6.1%  |
| -2               |           |          |            | (Poul Creek) | 1        | 0.0212    | 0.895 | 1.97  | 6.52   | 101.2 | 0.0080  | <b>22.8</b> |                  |        |
| -3               |           |          |            |              | 16       | 0.0287    | 0.726 | 28.0  | 35.9   | 49.3  | 0.0069  | <b>1.72</b> |                  |        |
| -4               |           |          |            |              | 16       | 0.0307    | 0.728 | 29.1  | 29.2   | 46.9  | 0.0105  | <b>2.47</b> |                  |        |
| -5               |           |          |            |              | 10       | 0.0222    | 0.723 | 13.5  | 13.1   | 47.2  | 0.0028  | <b>1.99</b> |                  |        |
| -6               |           |          |            |              | 10       | 0.0204    | 0.728 | 46.0  | 26.8   | 48.2  | 0.0071  | <b>1.74</b> |                  |        |
| -7               |           |          |            |              | 1        | 0.0265    | 0.884 | 2.17  | 7.24   | 105.8 | 0.0130  | <b>2.71</b> |                  |        |

**Table DR-1:** cont.

| Sample           | Elev. (m) | Latitude | Longitude  | Lithology                              | # Grains | Mass (mg) | Ft    | U ppm | Th ppm | MWAR | He pmol | Age (Ma)    | Avg. (Ma)        | % SD   |
|------------------|-----------|----------|------------|----------------------------------------|----------|-----------|-------|-------|--------|------|---------|-------------|------------------|--------|
| <b>05STP26-1</b> | 2208      | 60.6469° | -143.7903° | granite<br>(Chugach)                   | 16       | 0.0218    | 0.706 | 111   | 0.7    | 42.5 | 0.0190  | <b>2.14</b> | <b>2.28±0.16</b> | ±6.9%  |
| -2               |           |          |            |                                        | 14       | 0.0184    | 0.690 | 104   | 0.4    | 42.0 | 0.0142  | <b>2.06</b> |                  |        |
| -3               |           |          |            |                                        | 11       | 0.0205    | 0.728 | 98.3  | 1.0    | 50.1 | 0.0179  | <b>2.35</b> |                  |        |
| -4               |           |          |            |                                        | 5        | 0.0192    | 0.794 | 135   | 0.9    | 61.5 | 0.0239  | <b>2.23</b> |                  |        |
| -5               |           |          |            |                                        | 2        | 0.0173    | 0.828 | 112   | 1.6    | 71.2 | 0.0212  | <b>2.54</b> |                  |        |
| -6               |           |          |            |                                        | 4        | 0.0285    | 0.831 | 114   | 1.1    | 76.5 | 0.0331  | <b>2.36</b> |                  |        |
| <b>05STP27-1</b> | 1704      | 60.4996° | -143.7248° | arkose<br>(Kulthieth)                  | 15       | 0.0166    | 0.665 | 34.2  | 53.8   | 39.4 | 0.0017  | <b>0.63</b> | <b>0.63±0.11</b> | ±17.5% |
| -2               |           |          |            |                                        | 12       | 0.0176    | 0.700 | 36.5  | 41.4   | 41.5 | 0.0022  | <b>0.74</b> |                  |        |
| -3               |           |          |            |                                        | 19       | 0.0186    | 0.670 | 39.1  | 43.4   | 36.6 | 0.0024  | <b>0.76</b> |                  |        |
| -4               |           |          |            |                                        | 7        | 0.0191    | 0.787 | 19.3  | 33.1   | 56.0 | 0.0010  | <b>0.46</b> |                  |        |
| -5               |           |          |            |                                        | 10       | 0.0217    | 0.727 | 31.8  | 55.3   | 47.4 | 0.0021  | <b>0.57</b> |                  |        |
| <b>05STP33-1</b> | 2758      | 60.6441° | -143.7239° | granite<br>(Chugach)                   | 7        | 0.0584    | 0.850 | 66.4  | 23.9   | 78.4 | 0.0334  | <b>1.79</b> | <b>1.66±0.09</b> | ±5.6%  |
| -2               |           |          |            |                                        | 6        | 0.0623    | 0.845 | 73.2  | 27.6   | 84.8 | 0.0334  | <b>1.53</b> |                  |        |
| -3               |           |          |            |                                        | 10       | 0.0743    | 0.831 | 67.6  | 25.2   | 75.7 | 0.0379  | <b>1.60</b> |                  |        |
| -4               |           |          |            |                                        | 9        | 0.0454    | 0.816 | 71.1  | 27.5   | 64.9 | 0.0238  | <b>1.58</b> |                  |        |
| -5               |           |          |            |                                        | 3        | 0.0363    | 0.859 | 69.2  | 20.2   | 92.5 | 0.0206  | <b>1.70</b> |                  |        |
| -6               |           |          |            |                                        | 4        | 0.0296    | 0.826 | 76.0  | 26.7   | 76.2 | 0.0183  | <b>1.74</b> |                  |        |
| <b>06STP1-1</b>  | 1189      | 60.1686° | -140.5297° | sandstone<br>(Poul Creek/<br>Yakataga) | 16       | 0.0255    | 0.717 | 44.5  | 61.5   | 44.3 | 0.0094  | <b>1.65</b> | <b>1.55</b>      | >20%   |
| -2               |           |          |            |                                        | 8        | 0.0290    | 0.771 | 32.2  | 37.4   | 58.2 | 0.0267  | <i>5.54</i> |                  |        |
| -3               |           |          |            |                                        | 8        | 0.0226    | 0.753 | 34.4  | 44.0   | 52.3 | 0.0058  | <b>1.45</b> |                  |        |
| -4               |           |          |            |                                        | 16       | 0.0216    | 0.714 | 29.4  | 33.2   | 43.5 | 0.0145  | <i>4.82</i> |                  |        |
| -5               |           |          |            |                                        | 16       | 0.0235    | 0.721 | 39.2  | 39.2   | 43.8 | 0.0402  | <i>8.78</i> |                  |        |
| <b>06STP3-1</b>  | 1713      | 60.1643° | -140.3476° | sandstone<br>(Poul Creek)              | 17       | 0.0254    | 0.730 | 44.0  | 40.7   | 47.4 | 0.0386  | <b>7.41</b> | <b>7.21±1.16</b> | ±16.1% |
| -2               |           |          |            |                                        | 12       | 0.0201    | 0.724 | 26.5  | 35.9   | 47.7 | 0.0225  | <b>8.41</b> |                  |        |
| -3               |           |          |            |                                        | 4        | 0.0146    | 0.759 | 40.0  | 41.3   | 55.5 | 0.4309  | <i>148</i>  |                  |        |
| -4               |           |          |            |                                        | 4        | 0.0110    | 0.743 | 15.0  | 12.2   | 50.1 | 0.0041  | <b>5.30</b> |                  |        |
| -5               |           |          |            |                                        | 7        | 0.0238    | 0.753 | 59.6  | 17.8   | 56.2 | 0.7314  | <i>122</i>  |                  |        |
| -6               |           |          |            |                                        | 15       | 0.0123    | 0.645 | 45.7  | 52.5   | 35.9 | 0.0187  | <b>7.72</b> |                  |        |
| -7               |           |          |            |                                        | 10       | 0.0138    | 0.733 | 33.6  | 20.7   | 47.6 | 0.0275  | <i>13.5</i> |                  |        |
| <b>06STP4-1</b>  | 1676      | 60.2369° | -140.4611° | quartzite<br>(Orca Group)              | 14       | 0.0204    | 0.713 | 13.5  | 16.2   | 45.0 | 0.00038 | <i>1.44</i> | <b>0.56±0.08</b> | ±15.3% |
| -2               |           |          |            |                                        | 18       | 0.0207    | 0.680 | 28.3  | 38.1   | 39.1 | 0.00031 | <b>0.59</b> |                  |        |
| -3               |           |          |            |                                        | 10       | 0.0154    | 0.703 | 6.3   | 18.0   | 44.5 | 0.00007 | <b>0.44</b> |                  |        |
| -4               |           |          |            |                                        | 11       | 0.0130    | 0.699 | 47.4  | 55.3   | 41.4 | 0.00161 | <i>1.80</i> |                  |        |
| -5               |           |          |            |                                        | 11       | 0.0130    | 0.684 | 26.0  | 30.9   | 39.4 | 0.00031 | <b>0.64</b> |                  |        |
| <b>06STP50-1</b> | 875       | 60.4488° | -143.9837° | sandstone<br>(Kulthieth)               | 19       | 0.0244    | 0.678 | 55.0  | 54.1   | 40.3 | 0.0060  | <b>1.02</b> | <b>1.09±0.09</b> | ±8.3%  |
| -2               |           |          |            |                                        | 18       | 0.0221    | 0.684 | 48.6  | 63.6   | 39.6 | 0.0062  | <b>1.23</b> |                  |        |
| -3               |           |          |            |                                        | 19       | 0.0254    | 0.689 | 46.0  | 56.9   | 40.6 | 0.0054  | <b>1.00</b> |                  |        |
| -4               |           |          |            |                                        | 19       | 0.0247    | 0.691 | 45.4  | 53.5   | 39.7 | 0.0056  | <b>1.09</b> |                  |        |

**Table DR-1:** cont.

| Sample           | Elev. (m) | Latitude | Longitude  | Lithology   | # Grains | Mass (mg) | Ft    | U ppm | Th ppm | MWAR | He pmol | Age (Ma)    | Avg. (Ma)        | % SD   |
|------------------|-----------|----------|------------|-------------|----------|-----------|-------|-------|--------|------|---------|-------------|------------------|--------|
| <b>06STP71-1</b> | 853       | 60.1333° | -140.7119° | sandstone   | 10       | 0.0230    | 0.752 | 38.2  | 26.4   | 53.5 | 0.0215  | <b>5.35</b> | <b>3.95±1.06</b> | ±26.8% |
| -2               |           |          |            | (Yakataga)  | 8        | 0.0169    | 0.738 | 52.3  | 30.8   | 49.6 | 0.0145  | <b>3.73</b> |                  |        |
| -3               |           |          |            |             | 7        | 0.0151    | 0.744 | 91.1  | 104    | 48.6 | 0.0577  | <i>8.47</i> |                  |        |
| -4               |           |          |            |             | 13       | 0.0292    | 0.733 | 45.6  | 36.5   | 50.8 | 0.0169  | <b>2.78</b> |                  |        |
| -5               |           |          |            |             | 6        | 0.0173    | 0.769 | 29.9  | 18.5   | 55.3 | 0.0193  | <i>8.08</i> |                  |        |
| <b>01CH22-1</b>  | 1532      | 60.9104° | -144.3150° | schist      | 11       | 0.0077    | 0.637 | 33.3  | 17.8   | 33.1 | 0.0194  | <b>20.1</b> | <b>18.9±1.20</b> | ±6.3%  |
| -2               |           |          |            | (Chugach)   | 12       | 0.0035    | 0.521 | 38.6  | 17.3   | 25.7 | 0.0072  | <b>17.7</b> |                  |        |
| <b>01CH25-1</b>  | 320       | 60.6940° | -144.3774° | phyllite    | 20       | 0.0171    | 0.662 | 116.8 | 16.7   | 36.4 | 0.0708  | <b>9.92</b> | <b>10.7±1.31</b> | ±12.3% |
| -2               |           |          |            | (Chugach)   | 2        | 0.0068    | 0.750 | 50.3  | 6.9    | 56.7 | 0.0134  | <b>9.71</b> |                  |        |
| -3               |           |          |            |             | 20       | 0.0174    | 0.658 | 108.1 | 10.6   | 36.5 | 0.0695  | <b>10.5</b> |                  |        |
| -4               |           |          |            |             | 13       | 0.0204    | 0.710 | 65.8  | 4.0    | 46.4 | 0.0515  | <b>10.2</b> |                  |        |
| -5               |           |          |            |             | 8        | 0.0130    | 0.715 | 67.6  | 30.6   | 42.4 | 0.0716  | <i>19.7</i> |                  |        |
| -6               |           |          |            |             | 12       | 0.0222    | 0.738 | 92.8  | 12.9   | 51.9 | 0.1092  | <b>13.3</b> |                  |        |
| <b>01CH26-1</b>  | 884       | 60.4990° | -144.4772° | granitoid   | 4        | 0.0103    | 0.797 | 24.0  | 15.0   | 55.5 | 0.0021  | <b>1.79</b> | <b>2.02±0.14</b> | ±7.2%  |
| -2               |           |          |            | (Chugach)   | 5        | 0.0095    | 0.751 | 32.0  | 18.8   | 50.3 | 0.0028  | <b>2.04</b> |                  |        |
| -3               |           |          |            |             | 6        | 0.0170    | 0.752 | 30.3  | 16.8   | 54.3 | 0.0050  | <b>2.19</b> |                  |        |
| -4               |           |          |            |             | 7        | 0.0176    | 0.748 | 30.3  | 18.5   | 51.2 | 0.0049  | <b>2.06</b> |                  |        |
| <b>02CH28-1</b>  | 1625      | 60.2573° | -141.1584° | graywacke   | 12       | 0.0217    | 0.704 | 14.9  | 19.3   | 49.5 | 0.0034  | <i>2.19</i> | <b>0.74±0.14</b> | ±18.7% |
| -2               |           |          |            | (Kulthieth) | 15       | 0.0234    | 0.691 | 18.3  | 30.1   | 46.2 | 0.0012  | <b>0.55</b> |                  |        |
| -3               |           |          |            |             | 11       | 0.0242    | 0.721 | 19.2  | 16.6   | 54.2 | 0.0018  | <b>0.87</b> |                  |        |
| -4               |           |          |            |             | 14       | 0.0243    | 0.718 | 17.5  | 19.0   | 47.9 | 0.0016  | <b>0.81</b> |                  |        |

Ages in italics were considered outliers and not used for average age calculation

Elev. (m) – sample elevation

Ft – alpha ejection correction after Farley et al. (1996)

MWAR – mass weighted average radius of sample (µm)

Avg. – average AHe age (Ma)

% SD – standard deviation of average age as percentage of the average age

Chugach = Chugach terrane. Yakataga, Poul Creek, and Kulthieth are formations in the Yakutat terrane. Orca Group is a formation in the Prince William terrane.

**Table DR-2:** Glacier data.

| #  | Glacier             | ELA (m) | Drainage Area (km <sup>2</sup> ) | Exhumation Rate (mm/yr) |
|----|---------------------|---------|----------------------------------|-------------------------|
| 1  | “Martin River West” | 732     | 43                               | 2.0                     |
| 2  | Miles               | 1006    | 135                              | 1.5                     |
| 3  | “Mt. Tom White”     | 1341    | 20                               | 1.5                     |
| 4  | Martin River        | 853     | 176                              | 2.5                     |
| 5  | Fan                 | 1372    | 65                               | 2.5                     |
| 6  | “Martin River East” | 1036    | 42                               | 3.0                     |
| 7  | Stellar             | 671     | 575                              | 5.0                     |
| 8  | “Khitrov”           | 853     | 51                               | 4.0                     |
| 9  | “Mt. Stellar A”     | 1036    | 20                               | 3.0                     |
| 10 | “Mt. Stellar B”     | 975     | 8                                | 3.0                     |
| 11 | “Mt. Stellar C”     | 914     | 8                                | 3.0                     |
| 12 | “Mt. Stellar D”     | 914     | 9                                | 2.7                     |
| 13 | “Mt. Stellar E”     | 1036    | 36                               | 2.7                     |
| 14 | “Mt. Stellar F”     | 975     | 24                               | 2.7                     |
| 15 | Bering              | 1128    | 2516                             | 3.0                     |
| 16 | Leeper              | 732     | 30                               | 3.3                     |
| 17 | Yakataga            | 914     | 49                               | 2.0                     |
| 18 | Yaga                | 914     | 24                               | 1.5                     |
| 19 | White River         | 762     | 22                               | 1.5                     |
| 20 | Guyot               | 671     | 397                              | 2.5                     |
| 21 | Yhatse              | 610     | 1109                             | 2.7                     |
| 22 | Tyndall             | 701     | 166                              | 2.8                     |
| 23 | Libby               | 792     | 75                               | 2.5                     |
| 24 | Agassi              | 853     | 308                              | 2.5                     |
| 25 | Seward              | 914     | 1949                             | 4.0                     |
| 26 | “Marvine West”      | 823     | 27                               | 2.0                     |
| 27 | Marvine             | 823     | 115                              | 2.0                     |
| 28 | Hayden              | 732     | 55                               | 2.0                     |
| 29 | Turner              | 792     | 124                              | 2.0                     |
| 30 | Valerie             | 853     | 272                              | 2.0                     |
| 31 | “Mt. Foresta”       | 1097    | 23                               | 2.0                     |
| 32 | Hubbard             | 732     | 3406                             | 2.7                     |

# - refer to glaciers numbered in Figure 2, from west to east.

**Glacier** - glacier names are from 1:250,000 USGS topographic maps; those in parentheses have no official name.

**ELA** – equilibrium line altitude; measured based on contour shape on 1:250,000 USGS topographic maps in feet, converted to meters.

**Drainage Area** – measured graphically based on ice divides following ice surface gradients from 1:250,000 USGS topographic maps.

**Exhumation Rate** – based on contours on Figure 1.

**Figure DR-1**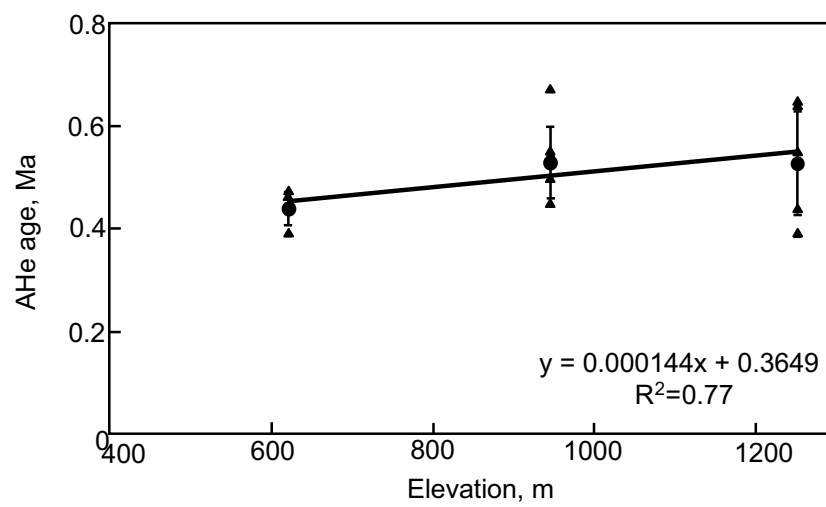

**Figure DR-2**

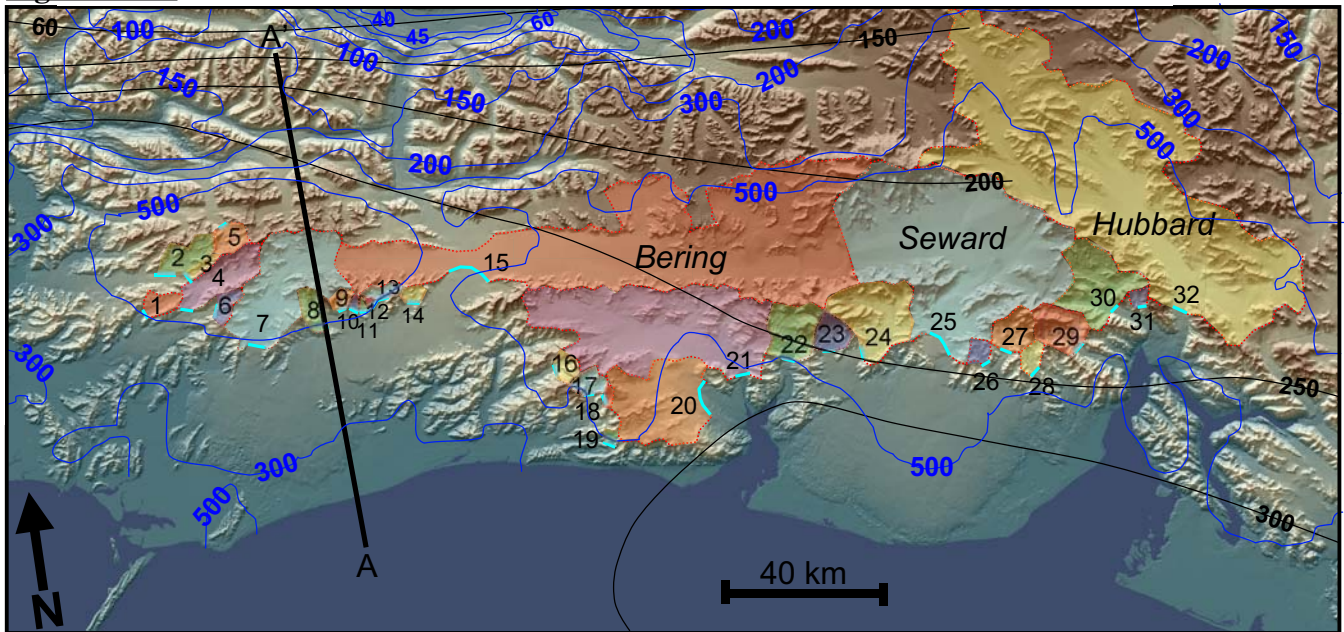

**Figure DR-3**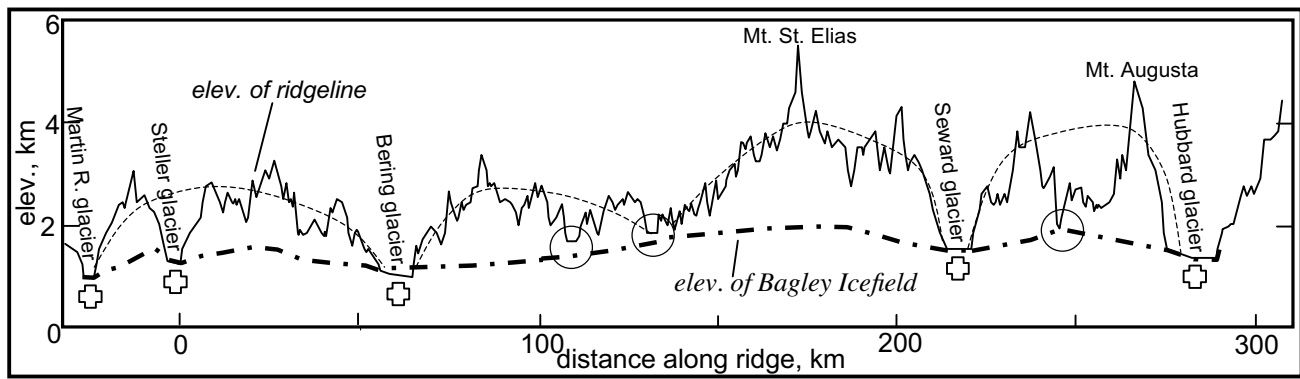

Supplement: Supplementary file 1 [file 22747376]
